# Supplementary material
Source: publisher site journal article supplement (https://static.cambridge.org/content/id/urn:cambridge.org:id:article:S0962728600008873/resource/name/Maschat_et_al,_Appendix_Figure3.pdf)
Supplement: Supplementary file 1 [file Maschat_et_al,_Appendix_Figure3.pdf]

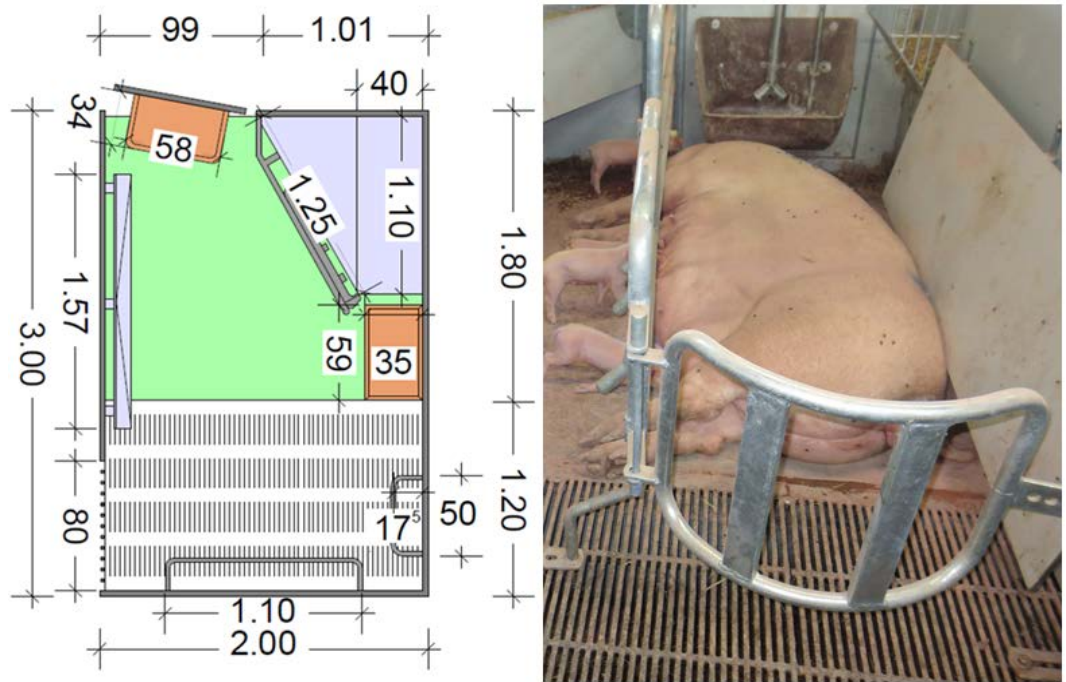

Figure 3: SWAP pen (Jyden Bur A/S, Vemb, Denmark): plan of pen with open crate and photograph of sow in closed crate. Crate formed by hinged swing fixed to front wall of the pen, closure to the back provided by a flexible element. Only width of the crate (length: 2.20 m with trough) adjustable. Lowest bar of swing (distance to floor: 0.36 m) featured with concavely shaped pins with tips directing to the inside of the pen. Flooring: 60% solid concrete floor (green and blue, blue represents the creep area) with a gradient of 2% located in the front area of the pen, 40% slatted iron cast (white) in the back. Sloping wall installed at the crate-site, back and side walls equipped with farrowing rails. Two feeding troughs (red) available: one in the front to feed the sow during crating, one in the back for the time after crating.
